# Supplementary material
Source: MDPI journal article supplement (https://www.mdpi.com/2073-445X/10/6/548)
Supplement: s1 [file s1]

## Supplementary Materials

Text S1: Code documentation of the call to the RESTful API of the Arungro model.

In order to access the online simulation service and make RESTful API requests to the Arungro model, the user must first take out a subscription to the product named “Models for bioenergy” at CREA API portal (<https://developer.progettoagridigit.it/>). The registration allows users to set their own profile, to obtain corresponding access credentials and personal keys to include when submitting requests to the service.

Once the credentials are obtained, the service can be called via a POST request at the URL: <https://apim-https://developer.progettoagridigit.it/model/v1/ModelExecution>, which can be made with dedicated web API testing tools (e.g. Postman application, freely downloadable at <https://www.postman.com/downloads/>). A typical POST request to the Arungro model made by Postman is shown as shown in Fig S.1

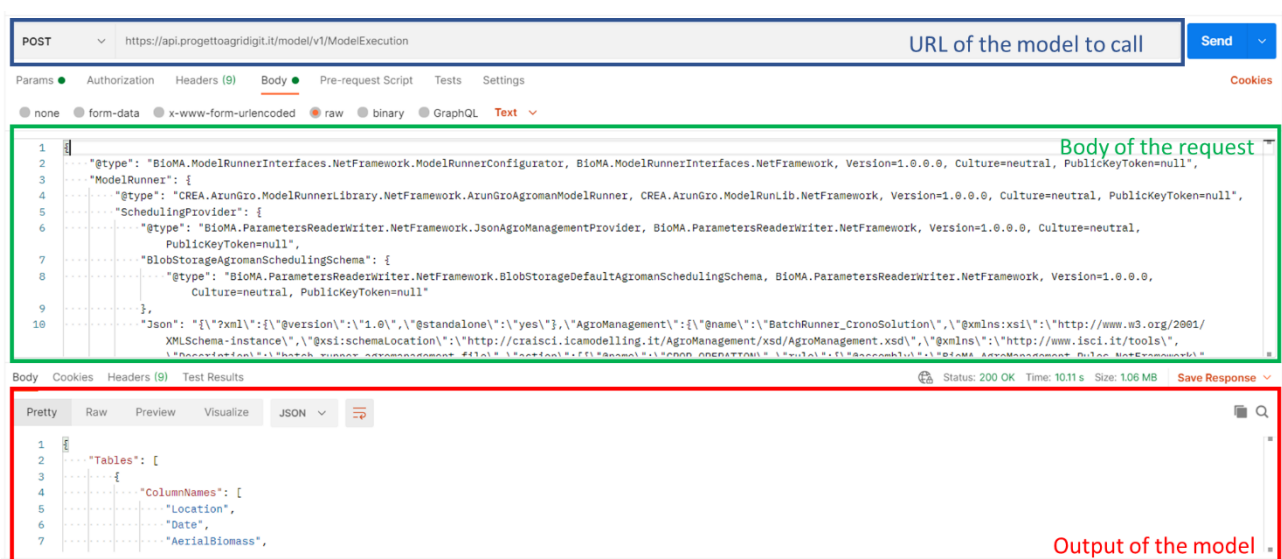

Fig.S1. POST request to the online service for Arungro model simulation.

Each request consists of two sections:

- (i) the URL address of the API to be called;
- (ii) the body of the request, which must contain the information needed to configure the simulation and provide weather and soil data, together with the scheduling of the management practices. The body of the request must be provided in json format.

The call returns results in a text format.

The general structure of the body of a request is reported in Fig. S2. An example of input formatting for different input domains is reported from figure S3 to S6. The scheduling of agricultural practices must, at least, define the transplanting date, and cutting and irrigation dates, if any (Fig. S3). The valorization of the complete list of model parameters is reported in Fig. S4, which are fully discussed in the main text of the paper. The model needs as weather input daily records of minimum and maximum air temperature ( $^{\circ}\text{C}$ ), cumulative rainfall ( $\text{mm d}^{-1}$ ), global solar radiation ( $\text{MJ m}^{-2} \text{d}^{-1}$ ), and wind speed ( $\text{m s}^{-2}$ ), and formatted as reported in Fig. S5. The set-up of soil data requires the definition of soil texture (sand and clay, % v/v) and organic carbon ( $\text{dag kg}^{-1}$ ) for each soil layer and horizon (Fig. S6).



```

"{"?xml":{"@version":"1.0","@standalone":"yes"},"AgroManagement":{"@name":"BatchRunner_CronoSolution"},"@xmlns:xsi":"http://
www.w3.org/2001/XMLSchema-
instance"},"@xsi:schemaLocation":"http://craisci.icamodelling.it/AgroManagement/xsd/AgroManagement.xsd"},"@xmlns":{"http://www.isci.it/tools
runner
agromanagement
file"},"action":{"@name":"CROP_OPERATION","rule":{"@assembly":"BioMA.AgroManagement.Rules.NetFramework"},"Rule
Date"},"parameter":{"@name":"RelativeDate","@value":"74"},"@name":"RotationYear","@value":"1"},"@assembly":"
BioMA.AgroManagement.Impacts.NetFramework"},"@name":"CropPlanting"},"parameter":{"@name":"CropName","@value":"Crop_Trial
"},"@name":"CropOperation"},"@value":"Planting"},"@name":"PlantingDepth","@value":"0.02"},"@assembly":"CROP_OPERATION
"},"rule":{"@assembly":"BioMA.AgroManagement.Rules.NetFramework"},"@name":"RuleDate"},"parameter":{"@name":"RelativeDate","
"},"@value":"295"},"@name":"RotationYear","@value":"1"},"@assembly":"BioMA.AgroManagement.Impacts.NetFramework\
"},"@name":"CropHarvest"},"parameter":{"@name":"CropName","@value":"Crop_Trial"},"@name":"CropOperation"},"@value":"Ha
rvest"},"@name":"CROP_OPERATION"},"rule":{"@assembly":"BioMA.AgroManagement.Rules.NetFramework"},"@name":"RuleDate","
"},"parameter":{"@name":"RelativeDate","@value":"295"},"@name":"RotationYear","@value":"2"},"@assembly":"BioM
A.AgroManagement.Impacts.NetFramework"},"@name":"CropHarvest"},"parameter":{"@name":"CropName","@value":"Crop_Trial"},"
@name":"CropOperation"},"@value":"Harvest"},"@name":"CROP_OPERATION"},"rule":{"@assembly":"BioMA.AgroManagement.Rul
es.NetFramework"},"@name":"RuleDate"},"parameter":{"@name":"RelativeDate","@value":"295"},"@name":"RotationYear","@value
":"3"},"@assembly":"BioMA.AgroManagement.Impacts.NetFramework"},"@name":"CropHarvest"},"parameter":{"@name":"
CropName"},"@value":"Crop_Trial"},"@name":"CropOperation"},"@value":"Harvest"},"@name":"CROP_OPERATION"},"rule":{"
@assembly":"BioMA.AgroManagement.Rules.NetFramework"},"@name":"RuleDate"},"parameter":{"@name":"RelativeDate","@value":"2
95"},"@name":"RotationYear","@value":"4"},"@assembly":"BioMA.AgroManagement.Impacts.NetFramework"},"@name":"
CropHarvest"},"parameter":{"@name":"CropName"},"@value":"Crop_Trial"},"@name":"CropOperation"},"@value":"Harvest"},"@
name":"CROP_OPERATION"},"rule":{"@assembly":"BioMA.AgroManagement.Rules.NetFramework"},"@name":"RuleDate"},"parameter":{"
@name":"RelativeDate","@value":"295"},"@name":"RotationYear","@value":"5"},"@assembly":"BioMA.AgroManagem
ent.Impacts.NetFramework"},"@name":"CropHarvest"},"parameter":{"@name":"CropName"},"@value":"Crop_Trial"},"@name":"Cro
pOperation"},"@value":"Harvest"}}}

```

Fig. S3. Region for defining the scheduling of agromanagement practices, formatted as required by the API call.

```

"{"?xml":{"@version":"1.0","@encoding":"utf-
8"},"@standalone":"yes"},"ParametersValues":{"Description":{"NameSpace":{"UNIMI.CaneML.Strategies.Composite.CropModels"},"TypeNa
me":{"ArungroC"},"URL":{"http://bioma.jrc.ec.europa.eu/ontology/JRC_MARS_biophysical_domain.owl"},"ParameterKey":{"ParameterKey"},"D
escription":{"Parameter
class
to
load
from
XML
for
the
ArungroC
class"},"VarInfoAttributes":{"VarInfo":{"@name":"TTEmergenceToPeakTillerPop"},"Description":{"Thermal Time Emergence To Peak Tiller
Population"},"MaxValue":"900","MinValue":"300","DeafaultValue":"600","Type":{"double"},"Units":{"Cd"},"URL":{"http://agsys.c
ra-cin.it/tools/"},"@name":"MaxTillerPop"},"Description":{"Maximum
Tiller
Population"},"MaxValue":"50","MinValue":"15","DeafaultValue":"30","Type":{"double"},"Units":{"tiller
m-
2"},"URL":{"http://agsys.cra-cin.it/tools/"},"@name":"FractionOfDyingTiller"},"Description":{"Fraction of tillers above the future mature tiller
population
(at
a
thermal
time
of
1600
°Cd)
that
senesce
per
unit
thermal
time"},"MaxValue":"0.005","MinValue":"0.003","DeafaultValue":"0.004","Type":{"double"},"Units":{"(°Cd)-
1"},"URL":{"http://agsys.cra-cin.it/tools/"},"@name":"TillerPopulationAfter1600TT"},"Description":{"Tiller Population After 1600 Thermal
Time"},"MaxValue":"30","MinValue":"1","DeafaultValue":"13.3","Type":{"double"},"Units":{"unitless"},"URL":{"http://agsys.cra-
cin.it/tools/"},"@name":"BaseTemperatureForTillerDevelopment"},"Description":{"Base temperature for tiller population
development"},"MaxValue":"20","MinValue":"10","DeafaultValue":"16","Type":{"double"},"Units":{"°C"},"URL":{"http://agsys.cra-
cin.it/tools/"},"@name":"CutOffTemperatureForTillerDevelopment"},"Description":{"Cutoff temperature for tiller population
development"},"MaxValue":"40","MinValue":"25","DeafaultValue":"30","Type":{"double"},"Units":{"°C"},"URL":{"http://agsys.cra-
cin.it/tools/"},"@name":"RowSpacing"},"Description":{"Row
spacing"},"MaxValue":"3","MinValue":"1","DeafaultValue":"1.4","Type":{"double"},"Units":{"m"},"URL":{"http://agsys.cra-
cin.it/tools/"},"@name":"UnstressedPlantExtensionRate"},"Description":{"Unstressed
Plant
Extension
Rate"},"MaxValue":"5","MinValue":"0","DeafaultValue":"0.176","Type":{"double"},"Units":{"mm
°C-1h-
1"},"URL":{"http://agsys.cra-cin.it/tools/"},"@name":"BaseTemperatureForPlantExtension"},"Description":{"Base Temperature For Plant
Extension"},"MaxValue":"20","MinValue":"5","DeafaultValue":"10.57","Type":{"double"},"Units":{"°C"},"URL":{"http://agsys.cra-
cin.it/tools/"},"@name":"BaseTemperatureForLeafEmission"},"Description":{"base
temperature
for
leaf
emission"},"MaxValue":"25","MinValue":"5","DeafaultValue":"10","Type":{"double"},"Units":{"°C"},"URL":{"http://agsys.cra-
cin.it/tools/"},"@name":"CutOffTemperatureForLeafEmission"},"Description":{"cutoff
temperature
for
leaf
emission"},"MaxValue":"50","MinValue":"25","DeafaultValue":"30","Type":{"double"},"Units":{"°C"},"URL":{"http://agsys.cra-
cin.it/tools/"},"@name":"MaximumNumberOfExpandingLeaves"},"Description":{"Maximum
number
of
expanding
leaves
on
a
tiller"},"MaxValue":"40","MinValue":"0","DeafaultValue":"5","Type":{"int"},"Units":{"unitless"},"URL":{"http://agsys.cra-
cin.it/tools/"},"@name":"LeafIDAboveWhichLeafAreaIsLimited"},"Description":{"Leaf
ID
Above
Which
Leaf
Area
is
Limited"},"MaxValue":"40","MinValue":"0","DeafaultValue":"15","Type":{"int"},"Units":{"unitless"},"URL":{"http://agsys.cra-
cin.it/tools/"},"@name":"MaxLeafArea1"},"Description":{"Cultivar
parameter
for
quadratic
equation
defining
max
leaf
area"},"MaxValue":"10","MinValue":"-10","DeafaultValue":"0","Type":{"double"},"Units":{"unitless"},"URL":{"http://agsys.cra-
cin.it/tools/"},"@name":"MaxLeafArea2"},"Description":{"Cultivar
parameter
for
quadratic
equation
defining
max
leaf
area"},"MaxValue":"100","MinValue":"-10","DeafaultValue":"27.2","Type":{"double"},"Units":{"unitless"},"URL":{"http://agsys.cra-
cin.it/tools/"},"@name":"MaxLeafArea3"},"Description":{"Cultivar
parameter
for
quadratic
equation
defining
max
leaf
area"},"MaxValue":"100","MinValue":"-50","DeafaultValue":"-
20.8"},"@Type":{"double"},"Units":{"unitless"},"URL":{"http://agsys.cra-
cin.it/tools/"},"@name":"MaxLeafLengthPerLeafNumber1"},"Description":{"Parameter for quadratic equation defining max leaf length per leaf
number"},"MaxValue":"10","MinValue":"-10","DeafaultValue":"-
0.376"},"@Type":{"double"},"Units":{"unitless"},"URL":{"http://agsys.cra-
cin.it/tools/"},"@name":"MaxLeafLengthPerLeafNumber2"},"Description":{"Parameter for quadratic equation defining max leaf length per leaf
number"},"MaxValue":"30","MinValue":"-
10"},"DeafaultValue":"12.2"},"@Type":{"double"},"Units":{"unitless"},"URL":{"http://agsys.cra-
cin.it/tools/"},"@name":"MaxLeafLengthPerLeafNumber3"},"Description":{"Parameter for quadratic equation defining max leaf length per leaf
number"},"MaxValue":"40","MinValue":"-
10"},"DeafaultValue":"21.8"},"@Type":{"double"},"Units":{"unitless"},"URL":{"http://agsys.cra-
cin.it/tools/"},"@name":"MaxLeafWidthPerLeafNumber1"},"Description":{"Parameter for quadratic equation defining max leaf width per leaf
number"},"MaxValue":"5","MinValue":"-5","DeafaultValue":"-
0.0345"},"@Type":{"double"},"Units":{"unitless"},"URL":{"http://agsys.cra-
cin.it/tools/"},"@name":"MaxLeafWidthPerLeafNumber2"},"Description":{"Parameter for quadratic equation defining max leaf width per leaf
number"},"MaxValue":"5","MinValue":"-
5"},"DeafaultValue":"2.243"},"@Type":{"double"},"Units":{"unitless"},"URL":{"http://agsys.cra-
cin.it/tools/"},"@name":"MaxLeafWidthPerLeafNumber3"},"Description":{"Parameter for quadratic equation defining max leaf width per leaf
number"},"MaxValue":"10","MinValue":"-
10"},"DeafaultValue":"7.75"},"@Type":{"double"},"Units":{"unitless"},"URL":{"http://agsys.cra-
cin.it/tools/"},"@name":"PhyllocronIntervalBelowSwitchNumber"},"Description":{"Phyllocron interval 1 (for leaf numbers below Pswitch,°C.d
(base
TTBASELFEF))"},"MaxValue":"500","MinValue":"0","DeafaultValue":"69","Type":{"double"},"Units":{"°Cd"},"URL":{"http://agsys.
cra-cin.it/tools/"},"@name":"PhyllocronIntervalAboveSwitchNumber"},"Description":{"Phyllocron interval 2 (for leaf numbers below Pswitch,°C.d
(base
TTBASELFEF))"},"MaxValue":"500","MinValue":"0","DeafaultValue":"169","Type":{"double"},"Units":{"°Cd"},"URL":{"http://agsy
s.cra-cin.it/tools/"},"@name":"LeafNumberAtPhyllocronSwitch"},"Description":{"Leaf
number
at
which
the
phyllocron
changes"},"MaxValue":"500","MinValue":"0","DeafaultValue":"18","Type":{"int"},"Units":{"unitless"},"URL":{"http://agsys.cra-

```

cin.it/tools/\",\",\{"@name\":"MaximumNumberOfGreenLeavesUnderWellWaterConditions",\,"Description\":"Maximum Number Of Green Leaves Under Well Water Conditions",\,"MaxValue\":"50",\,"MinValue\":"0",\,"DeafaultValue\":"12",\,"Type\":"int",\,"Units\":"unitless",\,"URL\":"http://agsys.cra-cin.it/tools/\",\",\{"@name\":"NumberOfLeavesPerShootSenescedPer100StressDays",\,"Description\":"Number Of Leaves Per Shoot Senesced Per 100 Stress Days",\,"MaxValue\":"50",\,"MinValue\":"0",\,"DeafaultValue\":"5",\,"Type\":"int",\,"Units\":"unitless",\,"URL\":"http://agsys.cra-cin.it/tools/\",\",\{"@name\":"MaximumCanopyLightExtinctionCoefficient",\,"Description\":"Maximum Canopy Light Extinction Coefficient",\,"MaxValue\":"1",\,"MinValue\":"0",\,"DeafaultValue\":"0.84",\,"Type\":"double",\,"Units\":"unitless",\,"URL\":"http://agsys.cra-cin.it/tools/\",\",\{"@name\":"MinimumCanopyExtinctionCoefficient",\,"Description\":"Minimum Canopy Extinction Coefficient",\,"MaxValue\":"1",\,"MinValue\":"0",\,"DeafaultValue\":"0.58",\,"Type\":"double",\,"Units\":"unitless",\,"URL\":"http://agsys.cra-cin.it/tools/\",\",\{"@name\":"LeafNumberAtWhichMaximumLightExtinctionOccurs",\,"Description\":"Leaf Number At Which Maximum Light Extinction Occurs",\,"MaxValue\":"100",\,"MinValue\":"0",\,"DeafaultValue\":"20",\,"Type\":"int",\,"Units\":"unitless",\,"URL\":"http://agsys.cra-cin.it/tools/\",\",\{"@name\":"InterceptionReductionAtFullLodging",\,"Description\":"Reduction in fractional interception by the canopy due to full lodging",\,"MaxValue\":"1",\,"MinValue\":"0",\,"DeafaultValue\":"0.1",\,"Type\":"double",\,"Units\":"unitless",\,"URL\":"http://agsys.cra-cin.it/tools/\",\",\{"@name\":"MaximumRadiationConversionEfficiency",\,"Description\":"Maximum Radiation Conversion Efficiency",\,"MaxValue\":"20",\,"MinValue\":"0",\,"DeafaultValue\":"9.9",\,"Type\":"double",\,"Units\":"g MJ-1",\,"URL\":"http://agsys.cra-cin.it/tools/\",\",\{"@name\":"BaseTemperatureForPhotosynthesis",\,"Description\":"Base Temperature For Photosynthesis",\,"MaxValue\":"20",\,"MinValue\":"0",\,"DeafaultValue\":"7",\,"Type\":"double",\,"Units\":"°C",\,"URL\":"http://agsys.cra-cin.it/tools/\",\",\{"@name\":"PhotosynthesisReductionAtFullLodging",\,"Description\":"Reduction in gross photosynthesis due to full lodging",\,"MaxValue\":"1",\,"MinValue\":"0",\,"DeafaultValue\":"0.28",\,"Type\":"double",\,"Units\":"unitless",\,"URL\":"http://agsys.cra-cin.it/tools/\",\",\{"@name\":"Q10ForMaintenanceRespiration",\,"Description\":"Fractional Increase In Respiration Rate Per 10°C Rise In Temperature",\,"MaxValue\":"5",\,"MinValue\":"0",\,"DeafaultValue\":"1.68",\,"Type\":"double",\,"Units\":"unitless",\,"URL\":"http://agsys.cra-cin.it/tools/\",\",\{"@name\":"ReferenceMaintenanceRespiration",\,"Description\":"Value Of Maintenance Respiration at 10°C",\,"MaxValue\":"1",\,"MinValue\":"0",\,"DeafaultValue\":"0.0033871",\,"Type\":"double",\,"Units\":"t d-1",\,"URL\":"http://agsys.cra-cin.it/tools/\",\",\{"@name\":"FractionOfGrossPhotosynthesisLostForGrowthRespiration",\,"Description\":"Fraction of gross photosynthesis lost for growth respiration",\,"MaxValue\":"1",\,"MinValue\":"0",\,"DeafaultValue\":"0.242",\,"Type\":"double",\,"Units\":"unitless",\,"URL\":"http://agsys.cra-cin.it/tools/\",\",\{"@name\":"MaximumPartitionFractionToAerialDryMass",\,"Description\":"Maximum Partition Fraction To Aerial Dry Mass",\,"MaxValue\":"1",\,"MinValue\":"0",\,"DeafaultValue\":"0.6",\,"Type\":"double",\,"Units\":"t t-1",\,"URL\":"http://agsys.cra-cin.it/tools/\",\",\{"@name\":"PartitioningCoefficient",\,"Description\":"Partitioning Coefficient for aerial dry mass",\,"MaxValue\":"1",\,"MinValue\":"0",\,"DeafaultValue\":"0.6",\,"Type\":"double",\,"Units\":"unitless",\,"URL\":"http://agsys.cra-cin.it/tools/\",\",\{"@name\":"MinimumPartitionFractionToAerialDryMass",\,"Description\":"Minimum Partition Fraction To Aerial Dry Mass",\,"MaxValue\":"1",\,"MinValue\":"0",\,"DeafaultValue\":"0.05",\,"Type\":"double",\,"Units\":"t t-1",\,"URL\":"http://agsys.cra-cin.it/tools/\",\",\{"@name\":"RootLengthPerMassOfRoot",\,"Description\":"Root Length Per Mass Of Root",\,"MaxValue\":"10000",\,"MinValue\":"0",\,"DeafaultValue\":"500",\,"Type\":"double",\,"Units\":"cm g-1",\,"URL\":"http://agsys.cra-cin.it/tools/\",\",\{"@name\":"BaseTemperatureForStalkElongation",\,"Description\":"Base temperature for stalk elongation",\,"MaxValue\":"16",\,"MinValue\":"0",\,"DeafaultValue\":"10",\,"Type\":"double",\,"Units\":"°C",\,"URL\":"http://agsys.cra-cin.it/tools/\",\",\{"@name\":"CutOffTemperatureForStalkElongation",\,"Description\":"Cutoff temperature for stalk elongation",\,"MaxValue\":"40",\,"MinValue\":"25",\,"DeafaultValue\":"30",\,"Type\":"double",\,"Units\":"°C",\,"URL\":"http://agsys.cra-cin.it/tools/\",\",\{"@name\":"ThermalTimeForStalkElongation",\,"Description\":"Thermal time after which stalk elongates",\,"MaxValue\":"1800",\,"MinValue\":"800",\,"DeafaultValue\":"1050",\,"Type\":"double",\,"Units\":"°C",\,"URL\":"http://agsys.cra-cin.it/tools/\",\",\{"@name\":"PartitionFractionAtHighTemperature",\,"Description\":"Fraction of aerial dry mass partitioned to stalk at high temperature",\,"MaxValue\":"1",\,"MinValue\":"0",\,"DeafaultValue\":"0.65",\,"Type\":"double",\,"Units\":"t t-1",\,"URL\":"http://agsys.cra-cin.it/tools/\",\",\{"@name\":"RootDepthIncreasePerGrowingDegreeDay",\,"Description\":"Root Depth Increase Per Growing Degree Day",\,"MaxValue\":"0.5",\,"MinValue\":"0",\,"DeafaultValue\":"0.22",\,"Type\":"double",\,"Units\":"cm (°Cd)-1",\,"URL\":"http://agsys.cra-cin.it/tools/\",\",\{"@name\":"BaseTemperatureForRootExtension",\,"Description\":"Base Temperature For Root Extension",\,"MaxValue\":"30",\,"MinValue\":"0",\,"DeafaultValue\":"10",\,"Type\":"double",\,"Units\":"°C",\,"URL\":"http://agsys.cra-cin.it/tools/\",\",\{"@name\":"CutOffTemperatureForRootExtension",\,"Description\":"CutOff Temperature For Root Extension",\,"MaxValue\":"40",\,"MinValue\":"25",\,"DeafaultValue\":"30",\,"Type\":"double",\,"Units\":"°C",\,"URL\":"http://agsys.cra-cin.it/tools/\",\",\{"@name\":"MaxRootLengthDensity",\,"Description\":"Maximum Root Length Density",\,"MaxValue\":"50",\,"MinValue\":"0",\,"DeafaultValue\":"5",\,"Type\":"double",\,"Units\":"cm cm-3",\,"URL\":"http://agsys.cra-cin.it/tools/\",\",\{"@name\":"MinRootLengthDensity",\,"Description\":"Minimum Root Length Density",\,"MaxValue\":"50",\,"MinValue\":"0",\,"DeafaultValue\":"0.02",\,"Type\":"double",\,"Units\":"cm cm-3",\,"URL\":"http://agsys.cra-cin.it/tools/\",\",\{"@name\":"FractionOfPlantElongationAttributableToStalkElongation",\,"Description\":"Fraction Of Plant Elongation Attributable To Stalk Elongation",\,"MaxValue\":"1",\,"MinValue\":"0",\,"DeafaultValue\":"0.16",\,"Type\":"double",\,"Units\":"unitless",\,"URL\":"http://agsys.cra-cin.it/tools/\",\",\{"@name\":"LeafAngle",\,"Description\":"Leaf Angle",\,"MaxValue\":"90",\,"MinValue\":"0",\,"DeafaultValue\":"30.2",\,"Type\":"double",\,"Units\":"°",\,"URL\":"http://agsys.cra-cin.it/tools/\",\",\{"@name\":"MaximumNumberOfLeavesPerTiller",\,"Description\":"Maximum number of leaves per tiller",\,"MaxValue\":"40",\,"MinValue\":"1",\,"DeafaultValue\":"30",\,"Type\":"int",\,"Units\":"unitless",\,"URL\":"http://agsys.cra-cin.it/tools/\",\",\{"@name\":"BaseTemperatureForConversionEfficiency",\,"Description\":"Base temperature for conversion efficiency",\,"MaxValue\":"25",\,"MinValue\":"0",\,"DeafaultValue\":"0",\,"Type\":"double",\,"Units\":"°C",\,"URL\":"http://agsys.cra-cin.it/tools/\",\",\{"@name\":"MaximumTemperatureForConversionEfficiency",\,"Description\":"Maximum temperature for conversion efficiency",\,"MaxValue\":"40",\,"MinValue\":"0",\,"DeafaultValue\":"30",\,"Type\":"double",\,"Units\":"°C",\,"URL\":"http://agsys.cra-cin.it/tools/\",\",\{"@name\":"OptimumTemperatureForConversionEfficiency",\,"Description\":"Optimum temperature for conversion efficiency",\,"MaxValue\":"30",\,"MinValue\":"0",\,"DeafaultValue\":"20",\,"Type\":"double",\,"Units\":"°C",\,"URL\":"http://agsys.cra-cin.it/tools/\",\",\{"@name\":"MaximumTillerPopulation",\,"Description\":"Maximum tiller population parameter",\,"MaxValue\":"50",\,"MinValue\":"0",\,"DeafaultValue\":"32",\,"Type\":"double",\,"Units\":"m-2",\,"URL\":"http://agsys.cra-cin.it/tools/\",\",\{"@name\":"BaseRootBiomassForTillerDevelopment",\,"Description\":"Minimum root biomass value for tiller development",\,"MaxValue\":"5",\,"MinValue\":"0",\,"DeafaultValue\":"0",\,"Type\":"double",\,"Units\":"t ha-1",\,"URL\":"http://agsys.cra-cin.it/tools/\",\",\{"@name\":"OptimumRootBiomassForTillerDevelopment",\,"Description\":"Optimum root biomass for tiller development",\,"MaxValue\":"20",\,"MinValue\":"0",\,"DeafaultValue\":"10",\,"Type\":"double",\,"Units\":"t ha-1",\,"URL\":"http://agsys.cra-cin.it/tools/\",\",\{"@name\":"MaximumRootBiomassForTillerDevelopment",\,"Description\":"Maximum root biomass for tiller development",\,"MaxValue\":"30",\,"MinValue\":"0",\,"DeafaultValue\":"20",\,"Type\":"double",\,"Units\":"t ha-1",\,"URL\":"http://agsys.cra-cin.it/tools/\",\",\{"@name\":"BaseTemperatureForEmergence",\,"Description\":"Base temperature for emergence from planting",\,"MaxValue\":"30",\,"MinValue\":"0",\,"DeafaultValue\":"10",\,"Type\":"double",\,"Units\":"°C",\,"URL\":"http://agsys.cra-cin.it/tools/\",\",\{"@name\":"OptimumTemperatureForEmergence",\,"Description\":"Optimum temperature for emergence from planting or ratooning",\,"MaxValue\":"45",\,"MinValue\":"15",\,"DeafaultValue\":"30",\,"Type\":"double",\,"Units\":"°C",\,"URL\":"http://agsys.cra-cin.it/tools/\",\",\{"@name\":"ThermalTimeToEmergenceFromRatooning",\,"Description\":"Thermal time to emergence for a ratoon crop",\,"MaxValue\":"500",\,"MinValue\":"0",\,"DeafaultValue\":"203",\,"Type\":"double",\,"Units\":"°Cd",\,"URL\":"http://agsys.cra-cin.it/tools/\",\",\{"@name\":"ThermalTimeToEmergenceFromPlanting",\,"Description\":"Thermal time to emergence for a plant crop",\,"MaxValue\":"900",\,"MinValue\":"50",\,"DeafaultValue\":"428",\,"Type\":"double",\,"Units\":"°Cd",\,"URL\":"http://agsys.cra-cin.it/tools/\",\",\{"@name\":"MaximumLeafLength",\,"Description\":"Absolute maximum leaf length",\,"MaxValue\":"110",\,"MinValue\":"60",\,"DeafaultValue\":"100",\,"Type\":"double",\,"Units\":"cm",\,"URL\":"http://agsys.cra-cin.it/tools/\",\",\{"@name\":"MaximumLeafWidth",\,"Description\":"Absolute maximum leaf width",\,"MaxValue\":"10",\,"MinValue\":"1",\,"DeafaultValue\":"3.5",\,"Type\":"double",\,"Units\":"cm",\,"URL\":"http://agsys.cra-cin.it/tools/\",\",\{"@name\":"MaximumLeafArea",\,"Description\":"Maximum leaf area assigned to all leaves above LeafIDAboveWhichLeafAreasLimited",\,"MaxValue\":"650",\,"MinValue\":"50",\,"DeafaultValue\":"360",\,"Type\":"double",\,"Units\":"cm2",\,"URL\":"http://agsys.cra-cin.it/tools/\",\",\{"@name\":"CropCoefficient",\,"Description\":"Crop Coefficient",\,"MaxValue\":"10",\,"MinValue\":"0",\,"DeafaultValue\":"1.15",\,"Type\":"double",\,"Units\":"unitless",\,"URL\":"http://agsys.cra-cin.it/tools/\",\",\{"@name\":"SoilWaterSupplyPotentialETCoeff",\,"Description\":"Soil Water Supply Potential Evapotranspiration Ratio Thershold Below Which Evaporation and Photosynthesis are Limited",\,"MaxValue\":"10",\,"MinValue\":"0",\,"DeafaultValue\":"1",\,"Type\":"double",\,"Units\":"unitless",\,"URL\":"http://agsys.cra-



```

\"Nitrate\": null,\r\n  \"Urea\": null,\r\n  \"CarbonInLitter\": null,\r\n  \"CNRatioOfLitter\": null,\r\n  \"CarbonInManure\": null,\r\n  \"CNRatioOfManure\": null,\r\n  \"Date\": \"0001-01-01T00:00:00\", \r\n  \"WaterTableDepth\": \"NaN\", \r\n  \"NitrateConcentration\": \"NaN\", \r\n  \"Salinity\": \"NaN\" \r\n } \r\n"

```

Fig. S6. Region for setting soil data for model simulation in API call.

The list of model outputs together with their brief description and unit of measurement is shown in Table S1.

Table S1. Arungro model output as returned by online service.

| Output variable                         | Unit of measurement | Description                                                      |
|-----------------------------------------|---------------------|------------------------------------------------------------------|
| Location                                |                     | Simulation site                                                  |
| Date                                    | yyyy-mm-dd          | Date                                                             |
| AerialBiomass                           | t ha-1              | Aerial dry biomass                                               |
| TotalBiomass                            | t ha-1              | Total dry biomass                                                |
| StalkBiomass                            | t ha-1              | Stalk dry biomass                                                |
| InterceptedPAR                          | MJ ha-1             | Intercepted photosynthetically active radiation                  |
| LAI                                     | m <sup>2</sup> m-2  | Green leaf area index                                            |
| TotalLAI                                | m <sup>2</sup> m-2  | Total leaf area index                                            |
| TotalLeavesNumber                       | leaves m-2          | Number of leaves per square meter                                |
| TillerPopulation                        | tiller m-2          | Number of tillers per square meter                               |
| TotalMaxTillerPopulation                | tiller m-2          | Max attainable tiller population                                 |
| ThermalTimeForTillerDevelopment         | °C d                | Thermal time for tiller development                              |
| ThermalTimeFromPlantingOrRatooning      | °C d                | Thermal time from planting or ratooning                          |
| PotentialTranspiration                  | mm d-1              | Potential transpiration                                          |
| ActualTranspiration                     | mm d-1              | Actual transpiration                                             |
| RootDepth                               | cm                  | Root depth                                                       |
| CropWaterStressForRootDepth             | unitless            | Water stress on root deepening (max stress=0, min stress=1)      |
| CropWaterStressCarbonAssimilation_SWDF1 | unitless            | Water stress on carbon assimilation (max stress=0, min stress=1) |
| CropWaterStressExpansiveGrowth_SWDF2    | unitless            | Water stress on leaf expansion (max stress=0, min stress=1)      |
| StressDays                              | counter             | Number of consecutive severe water stress day                    |
| WaterStressOnTillerDevelopment          | unitless            | Water stress on tiller development (max stress=0, min stress=1)  |
| SWC_3cm                                 | mm mm-1             | Soil water content of the 0-5 cm layer                           |
| SWC_20cm                                | mm mm-1             | Soil water content of the 10-20 cm layer                         |
| SWC_40cm                                | mm mm-1             | Soil water content of the 30-40 cm layer                         |
| SWC_60cm                                | mm mm-1             | Soil water content of the 50-60 cm layer                         |
